# Supplementary material
Source: PubMed Central journal article supplement (PMC3463050)
Supplement: supp_75.13.1141_kappos.pdf [file supp_75.13.1141_kappos.pdf]

- 
- ▶ **La calidad de vida, la depresión y el cansancio en la EM mejoran tras una terapia basada en mindfulness o atención plena: un ensayo aleatorizado**

Grossman P, Kappos L, Gensicke H, D'Souza M, Mohr DC, Penner IK, Steiner C

*Neurology* 2010;75(13): 1141-9

**OBJETIVO:** La calidad de vida relacionada con la salud (CVRS) con frecuencia se ve reducida en los individuos con esclerosis múltiple (EM), con elevada incidencia de depresión, cansancio y ansiedad. Hemos examinado los efectos de una

intervención basada en mindfulness, conocida también como terapia de atención plena, en comparación con la atención habitual en lo relación con CVRS, depresión y cansancio en adultos con EM remitente-recurrente o secundaria progresiva.

**MÉTODOS:** Se asignó aleatoriamente a un total de 150 pacientes aleatoriamente a la intervención ( $n = 76$ ) o a la atención habitual ( $n = 74$ ). La intervención basada en mindfulness consistía en un programa estructurado de ocho semanas de terapia de atención plena. Se realizaron evaluaciones basales, postintervención y de seguimiento a los seis meses. Las variables primarias correspondían a CVRS, depresión y cansancio específicos de la enfermedad y no específicos de la enfermedad. Como variables secundarias se incluían la consecución de metas personales y la adherencia a las tareas.

**RESULTADOS:** El abandono fue bajo en el grupo de intervención (5 %) y la tasa de asistencia, elevada (92 %). Empleando un análisis por intención de tratar, la intervención basada en mindfulness, en comparación con la atención habitual, mejoró las dimensiones no físicas de las variables primarias postintervención y en el seguimiento ( $p < 0,002$ ); tamaños del efecto: 0,4-0,9 posterior al tratamiento y 0,3-0,5 en el seguimiento. Cuando se repitieron los análisis entre subgrupos con niveles clínicamente relevantes de depresión, cansancio o ansiedad previamente a la intervención, los efectos postintervención y en el seguimiento continuaron siendo significativos y los tamaños del efecto fueron mayores que para la muestra total. **CONCLUSIONES:** Además de la evidencia de una mejoría en la CVRS y el bienestar, estos hallazgos demuestran una amplia viabilidad y aceptación, además de satisfacción y adherencia, de un programa de terapia basada en mindfulness para pacientes con EM. Los resultados también pueden tener implicaciones en el tratamiento de otros trastornos crónicos que reducen la CVRS.

**CLASIFICACIÓN DE EVIDENCIA:** Este ensayo proporciona evidencia de Clase III de que la terapia basada en mindfulness comparada con una atención habitual produjo mejoras en la

CVRS, el cansancio y la depresión hasta seis meses después de la intervención.
